# Supplementary figures and images for: Dynamic Portfolio Allocation Under Market Incompleteness and Wealth Effects
Source: Atypon-hosted journal article supplement (doi:10.1287/opre.2024.0976), 2025-09-16

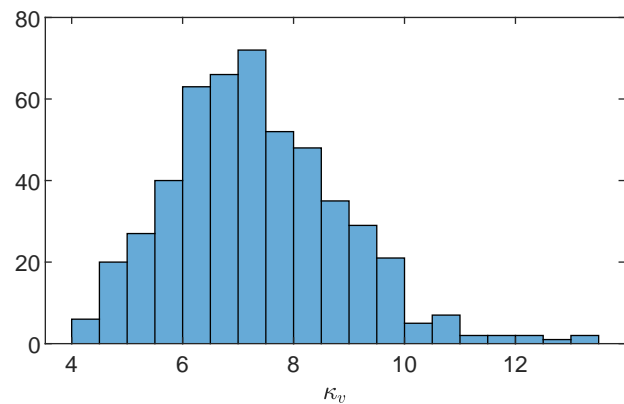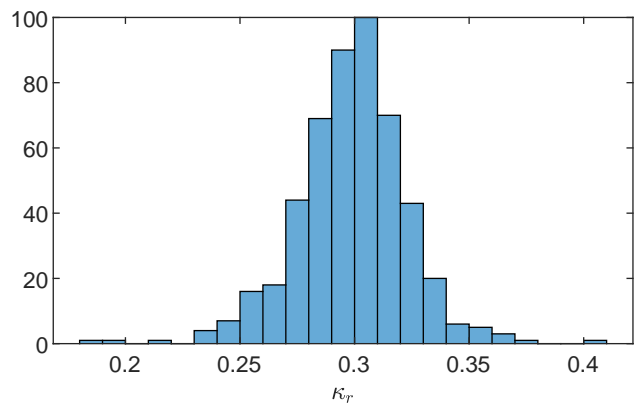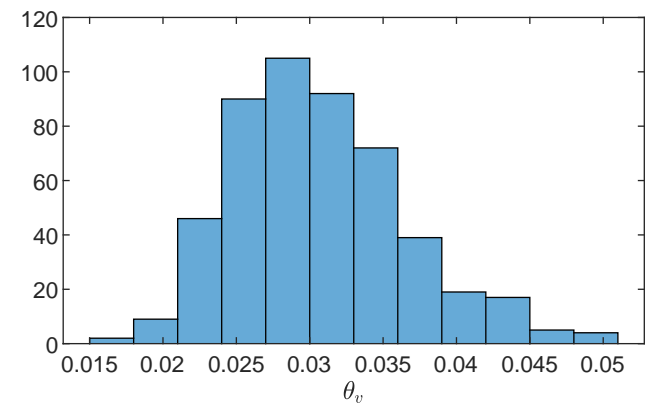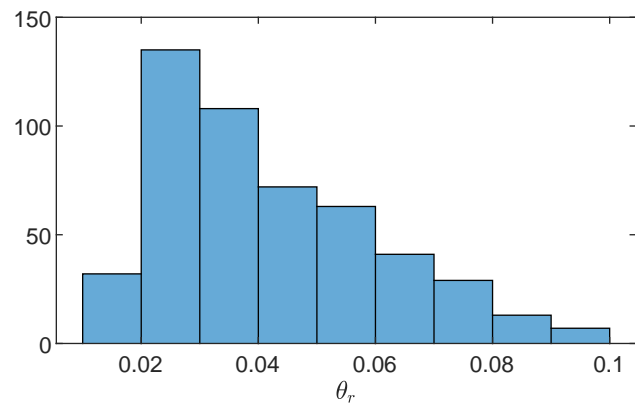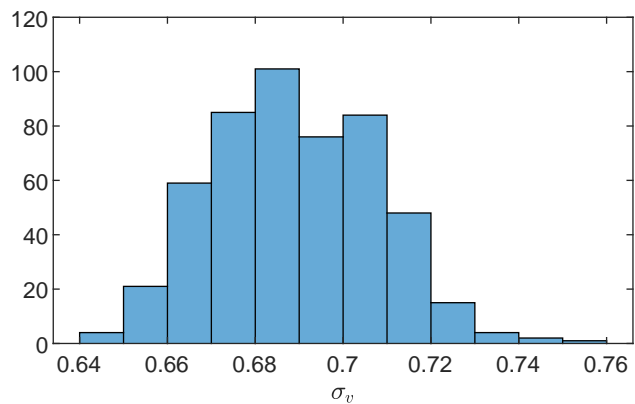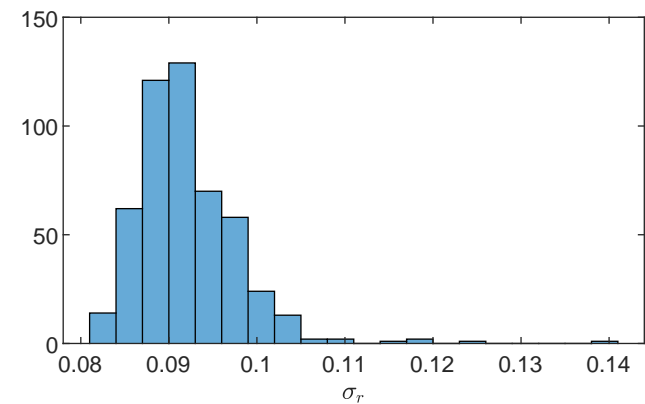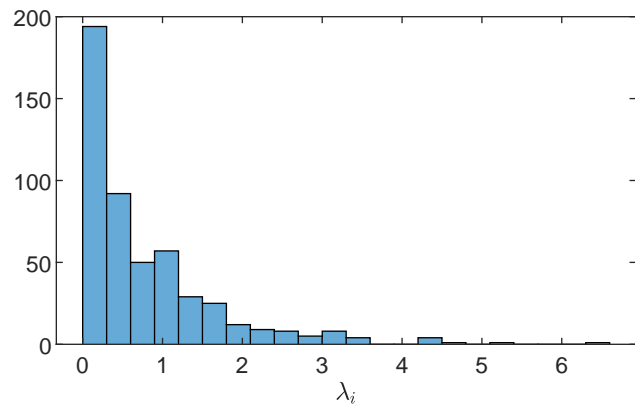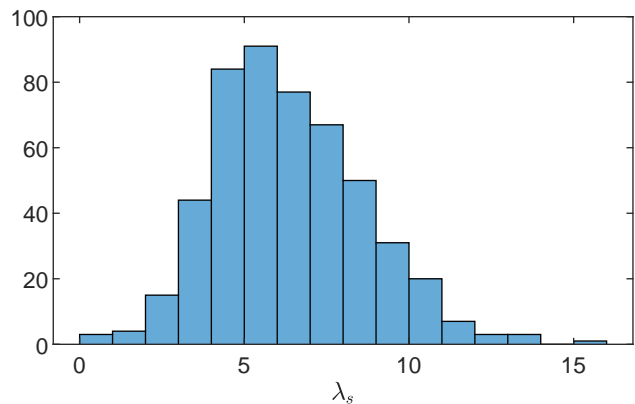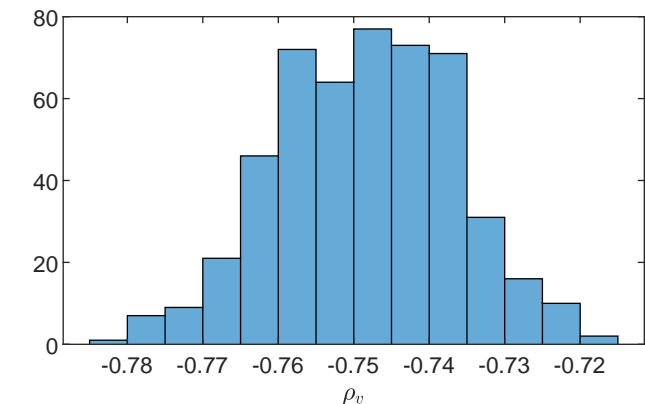

Supplement: opre.2024.0976.cd.zip [file MC_hist_graph_231122.pdf › Codes_Data_OPRE_2024-04-0976/calibration codes/MC_hist_graph_231122.pdf]

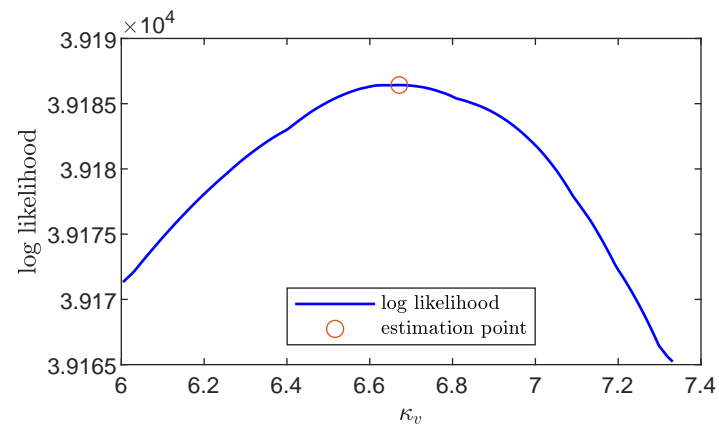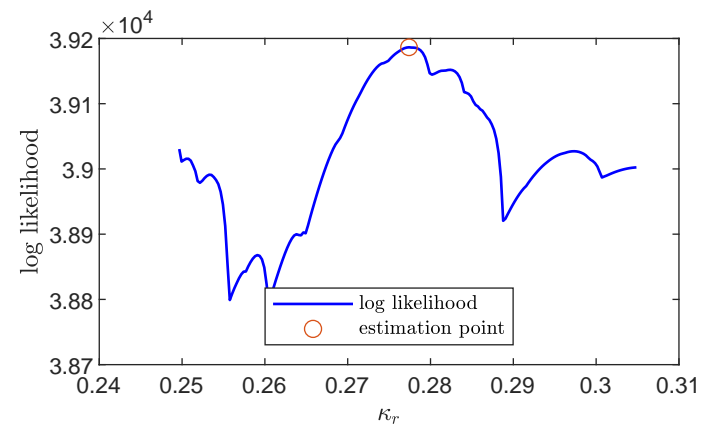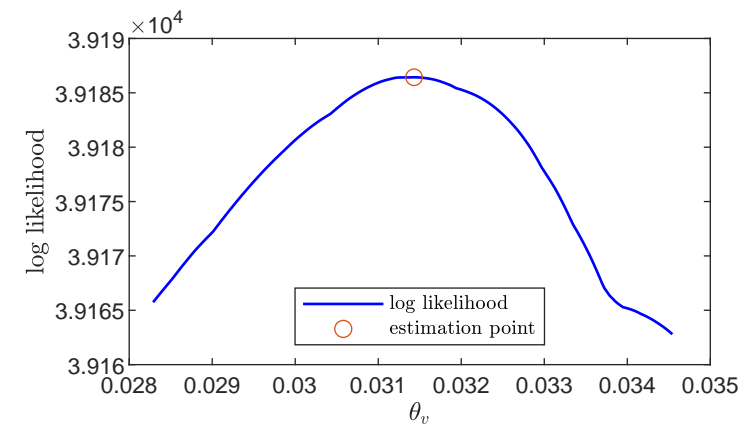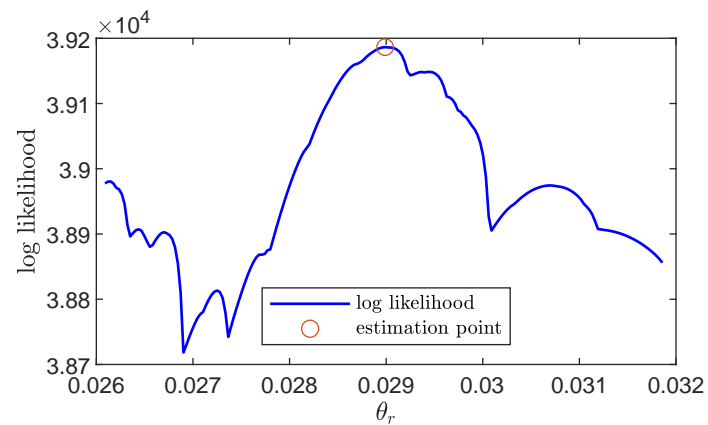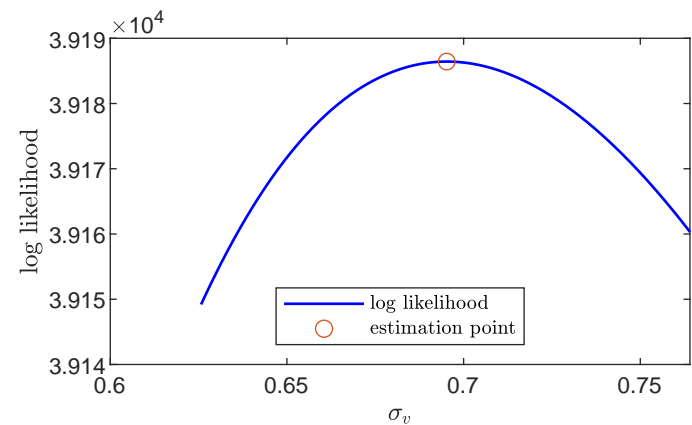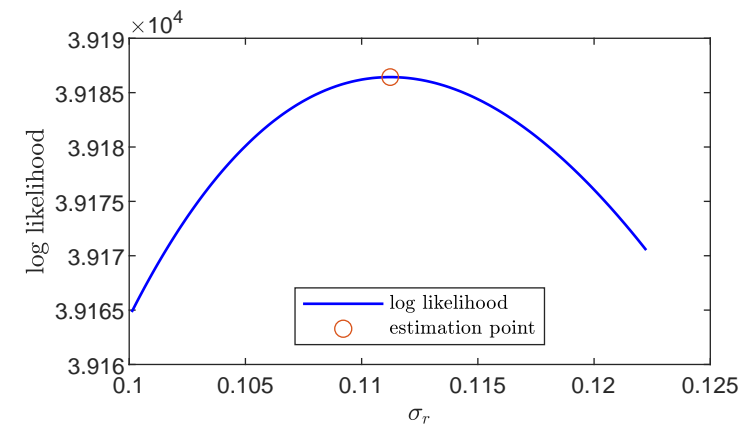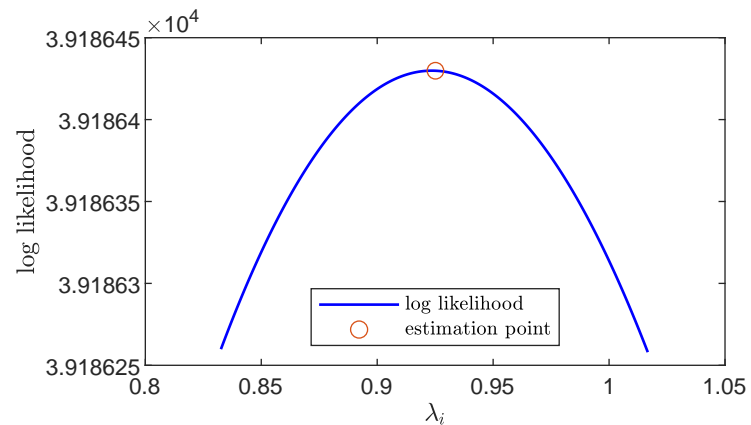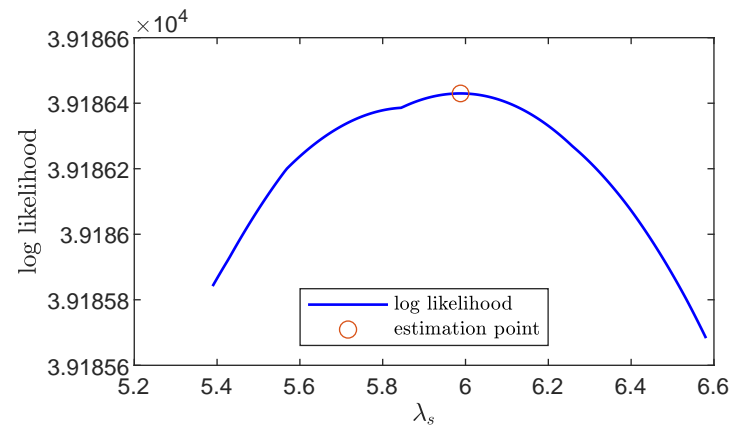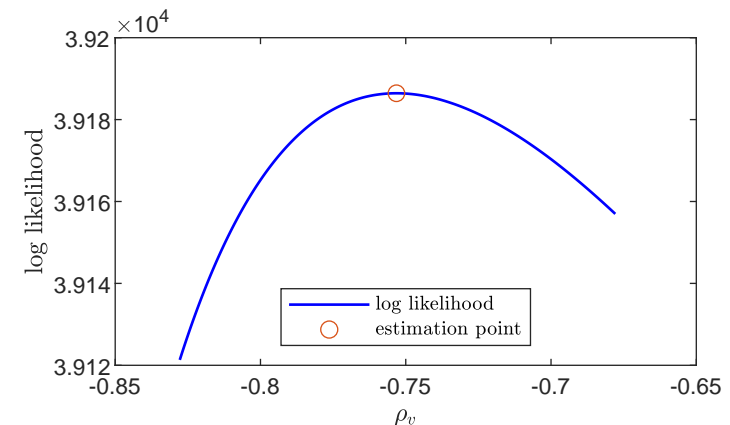

Supplement: opre.2024.0976.cd.zip [file local_optim_plot_230916.pdf › Codes_Data_OPRE_2024-04-0976/calibration codes/local_optim_plot_230916.pdf]

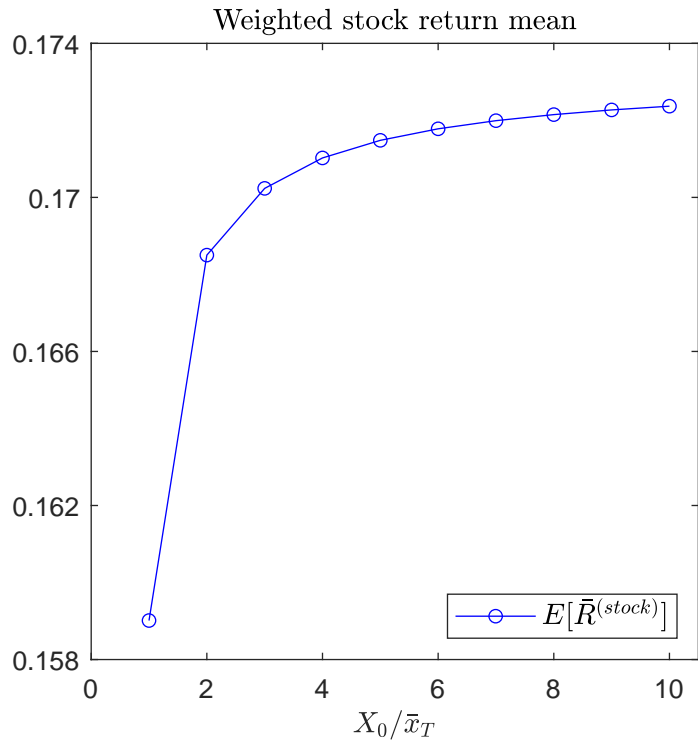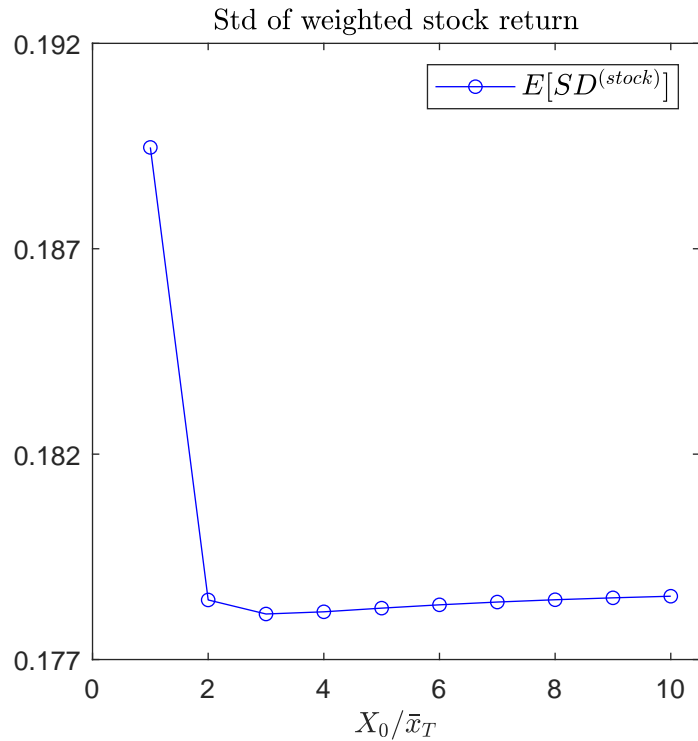

Supplement: opre.2024.0976.cd.zip [file avg_std_weight_stock_ret.pdf › Codes_Data_OPRE_2024-04-0976/figures/avg_std_weight_stock_ret.pdf]

Correlation between  $\pi_{i\Delta}^{(stock)}$  and stock return

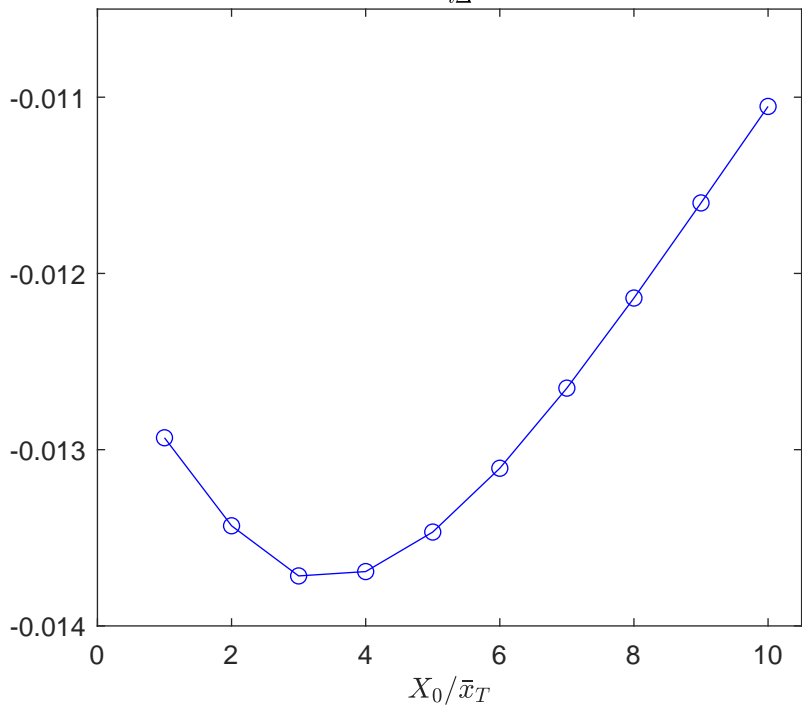

Supplement: opre.2024.0976.cd.zip [file corr_pi_stock_ret.pdf › Codes_Data_OPRE_2024-04-0976/figures/corr_pi_stock_ret.pdf]

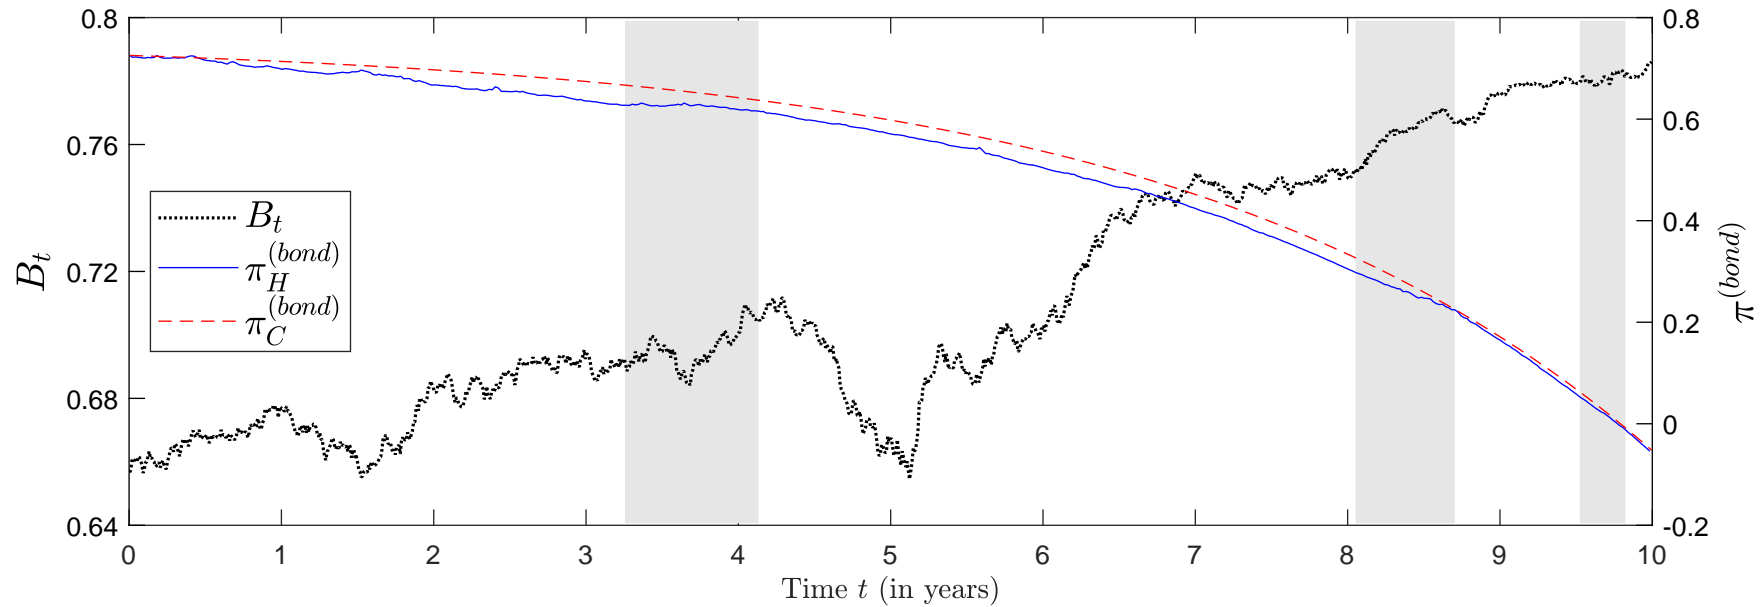

Supplement: opre.2024.0976.cd.zip [file cycle_path_hc_compare_bond.pdf › Codes_Data_OPRE_2024-04-0976/figures/cycle_path_hc_compare_bond.pdf]

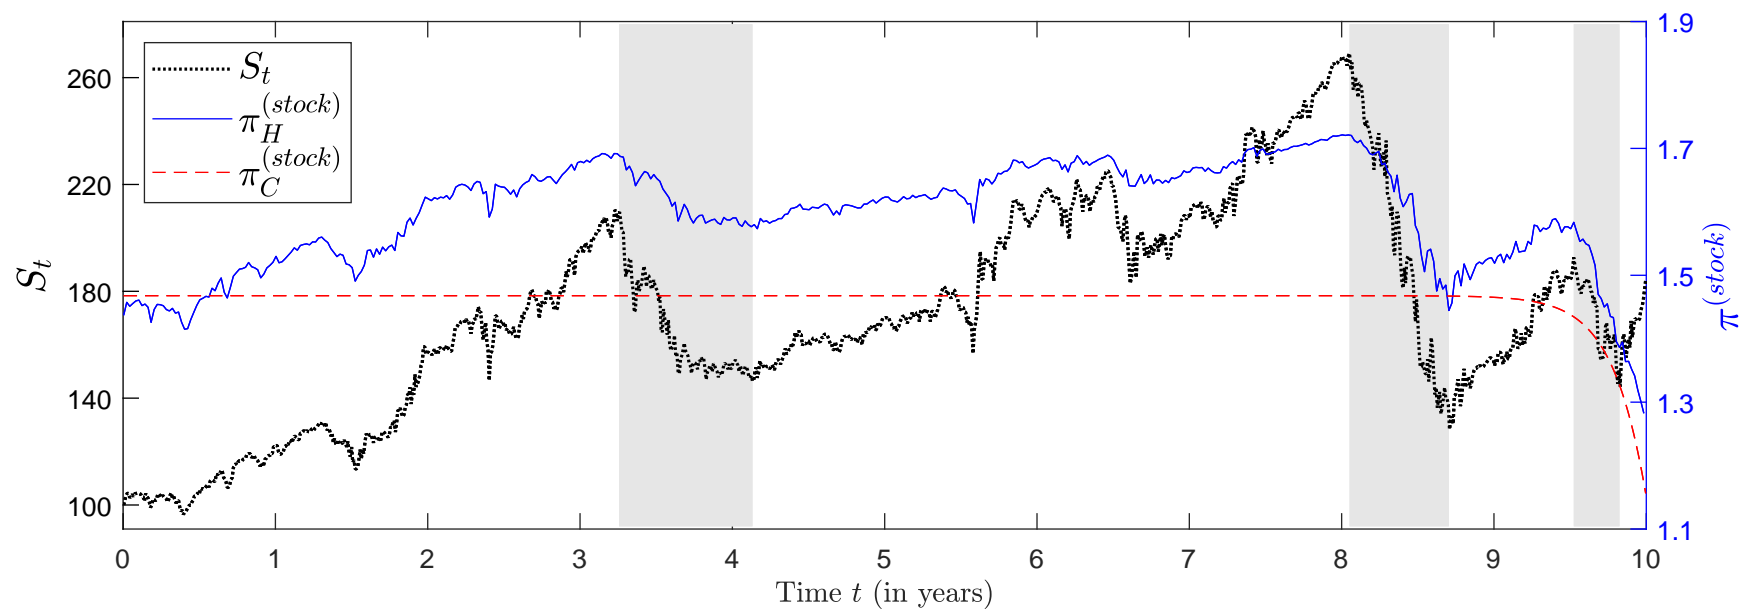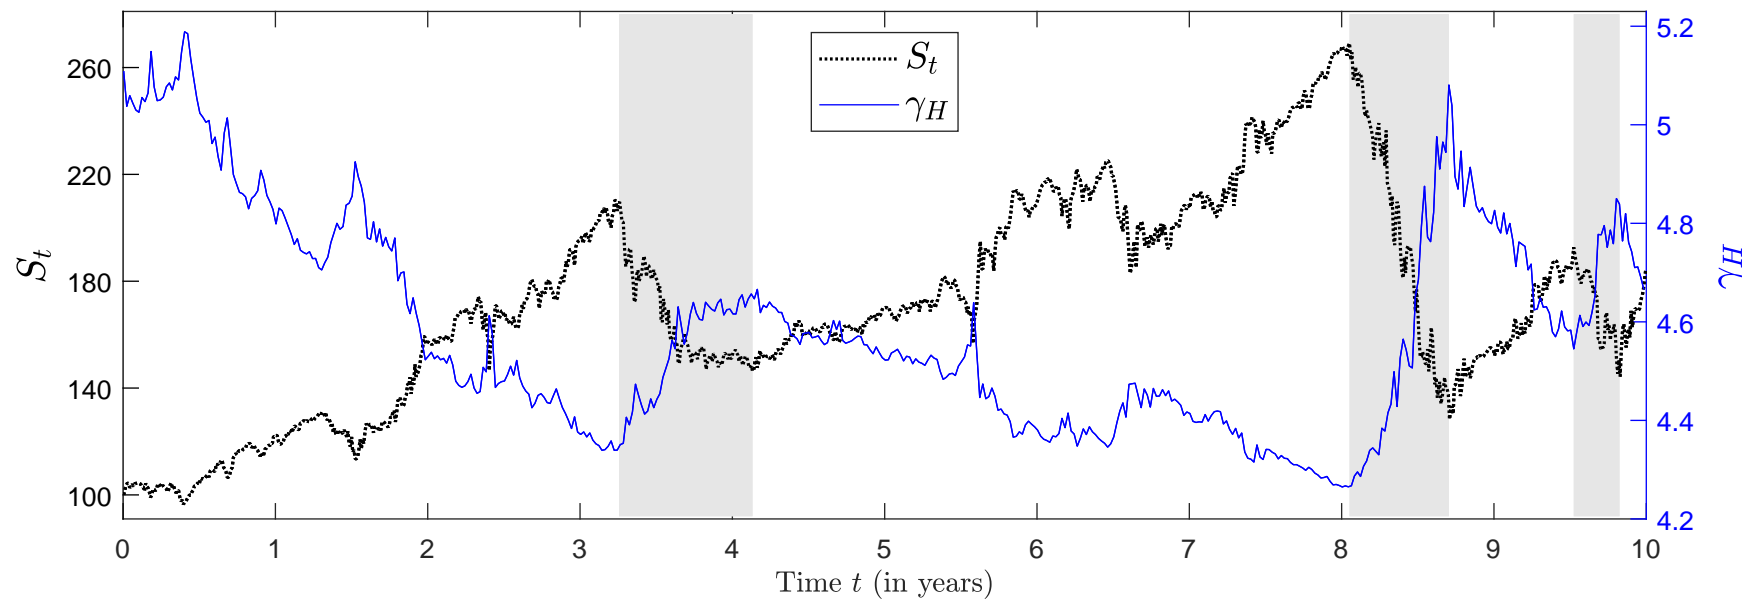

Supplement: opre.2024.0976.cd.zip [file cycle_path_hc_compare_stock.pdf › Codes_Data_OPRE_2024-04-0976/figures/cycle_path_hc_compare_stock.pdf]

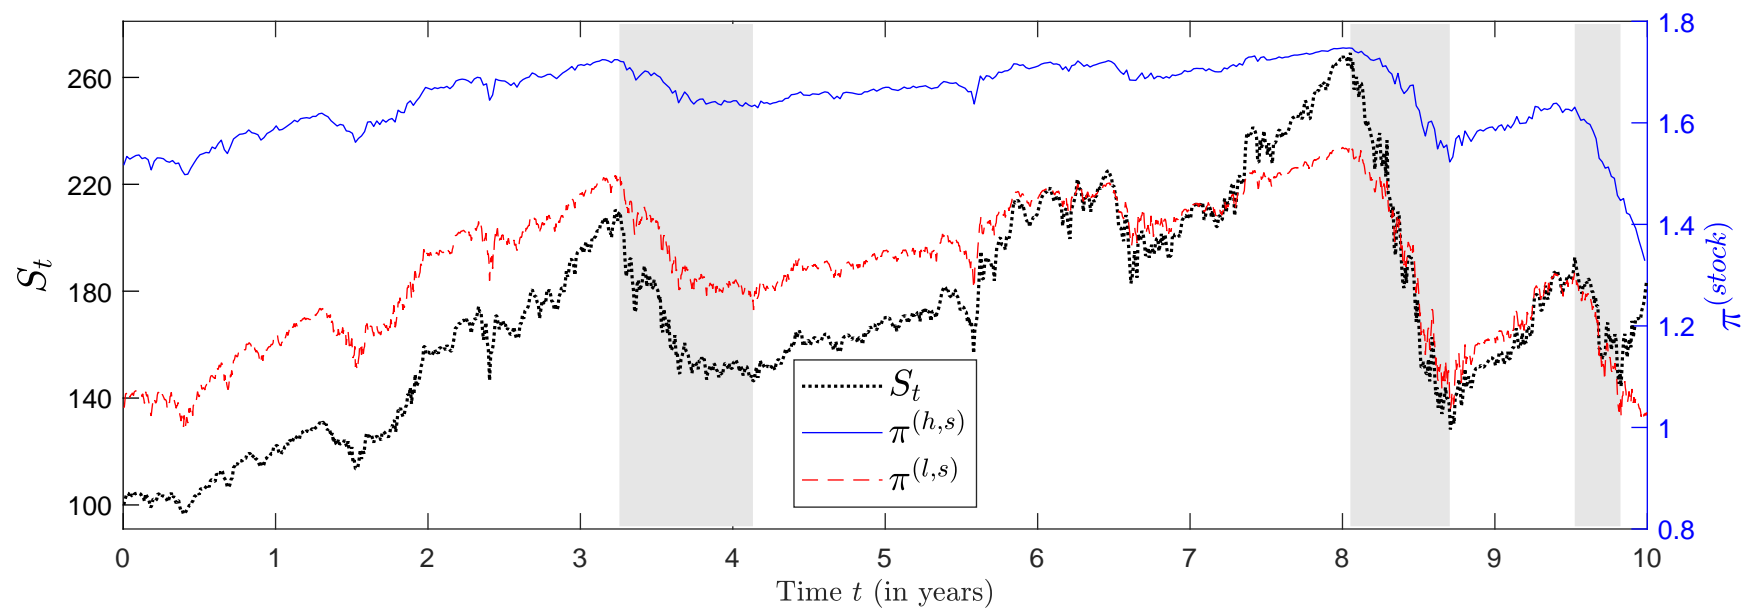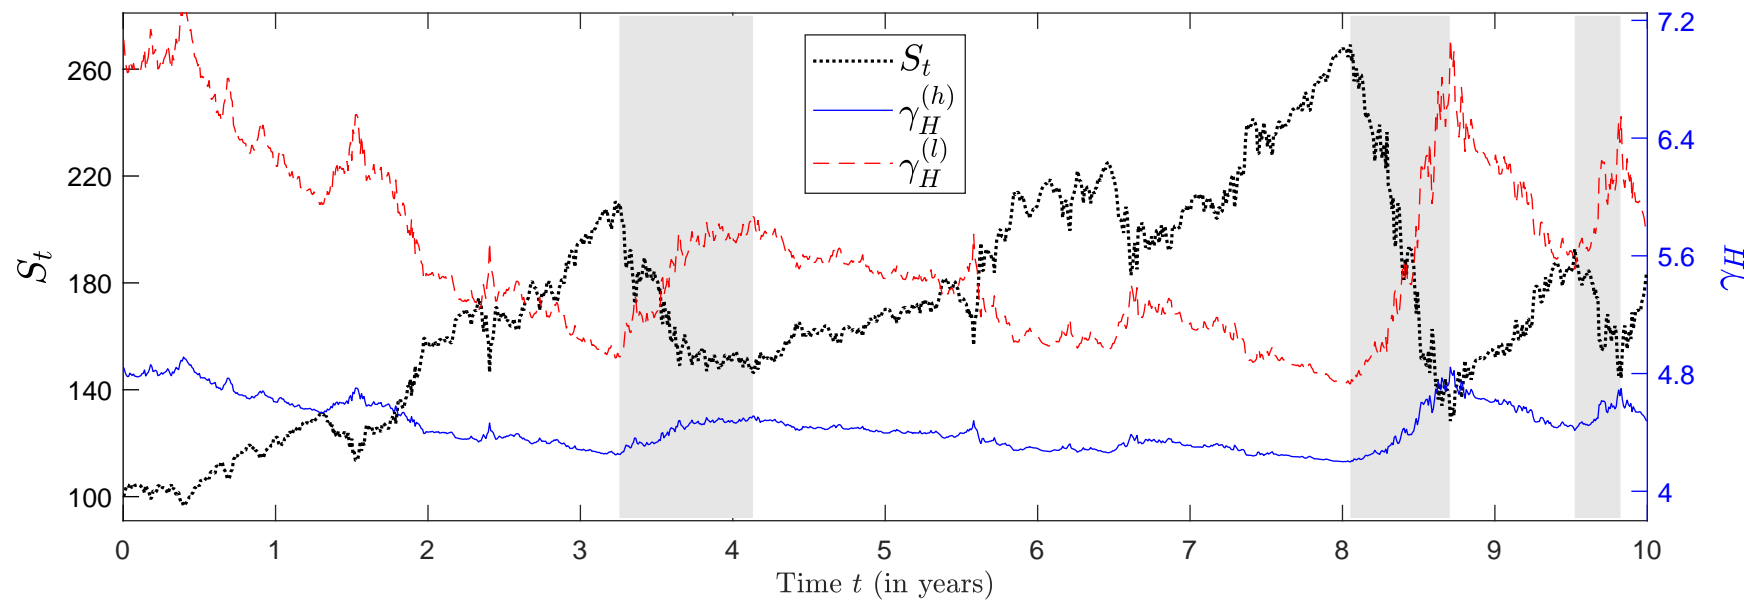

Supplement: opre.2024.0976.cd.zip [file heter_cycle_ratio_path_231029.pdf › Codes_Data_OPRE_2024-04-0976/figures/heter_cycle_ratio_path_231029.pdf]

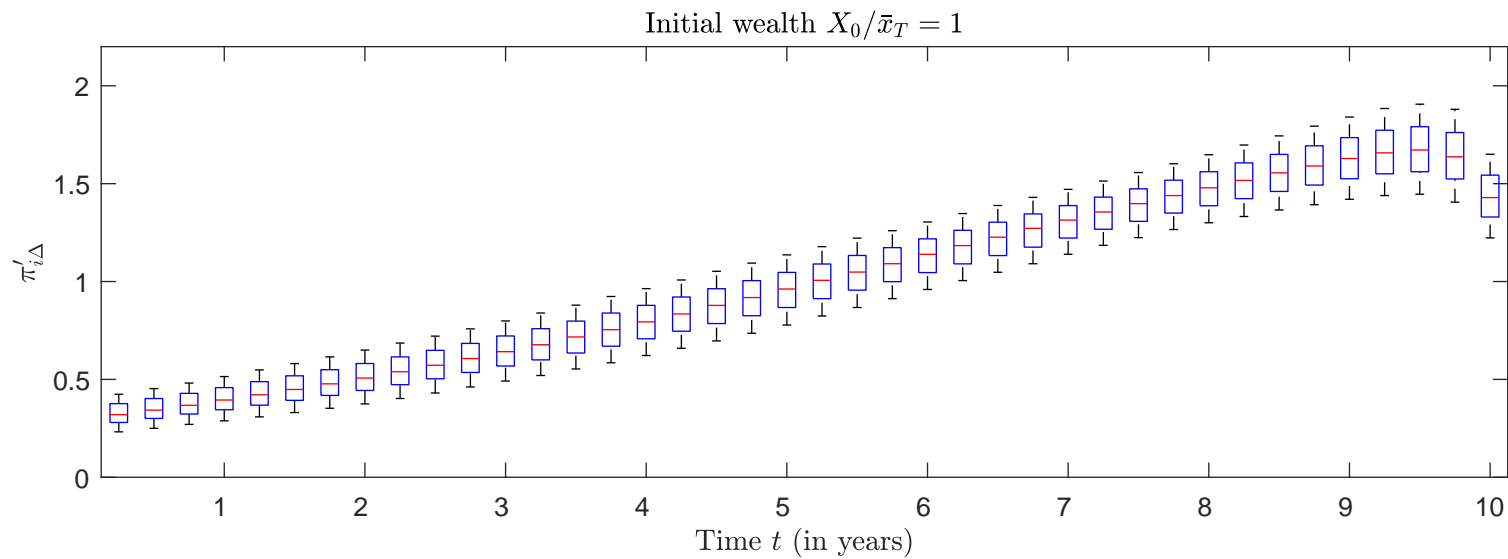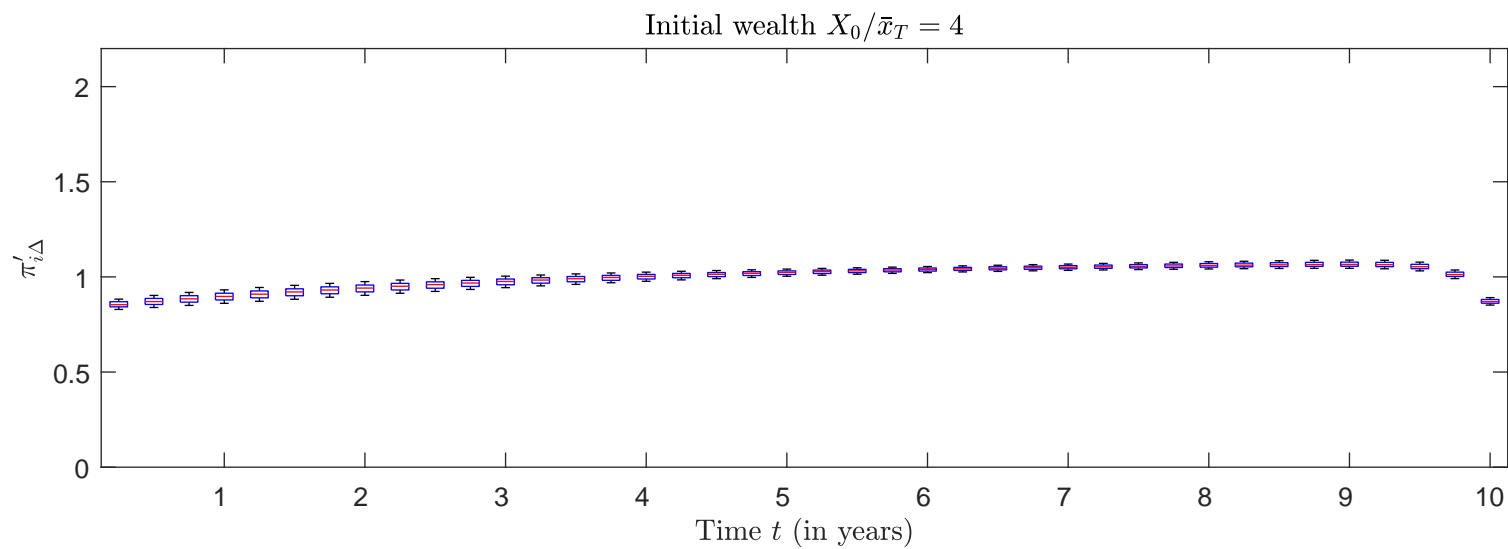

Supplement: opre.2024.0976.cd.zip [file norm_pi_boxplot.pdf › Codes_Data_OPRE_2024-04-0976/figures/norm_pi_boxplot.pdf]

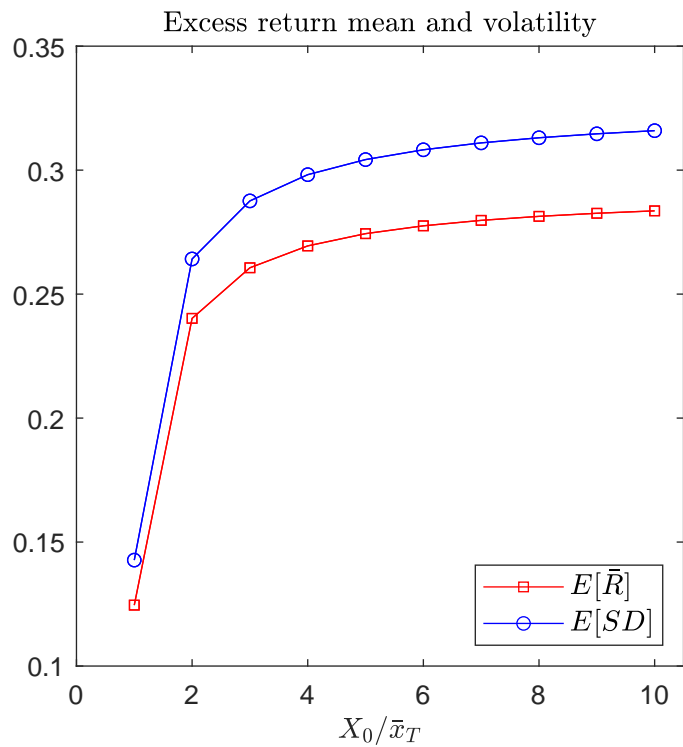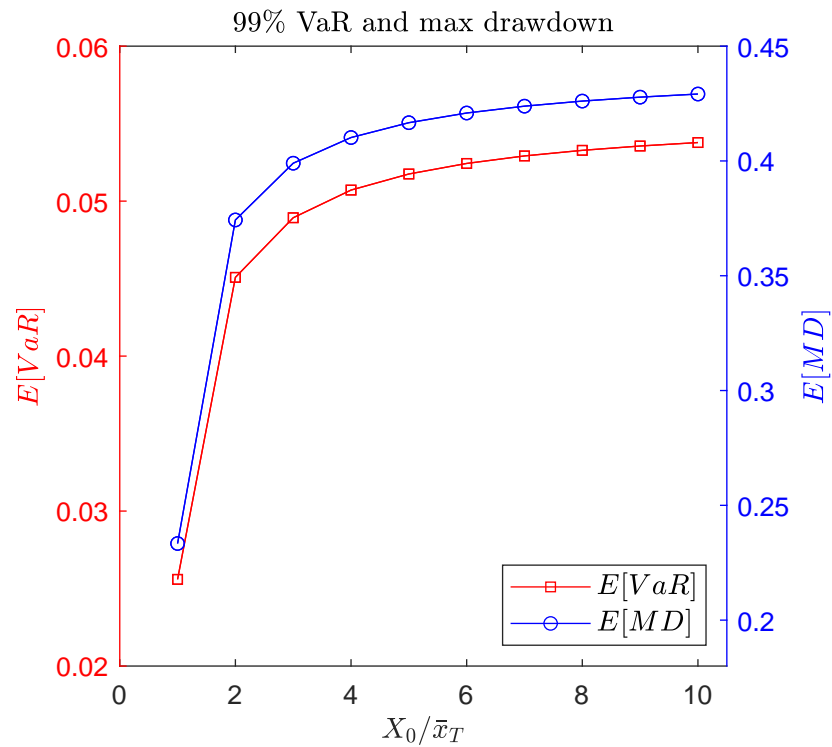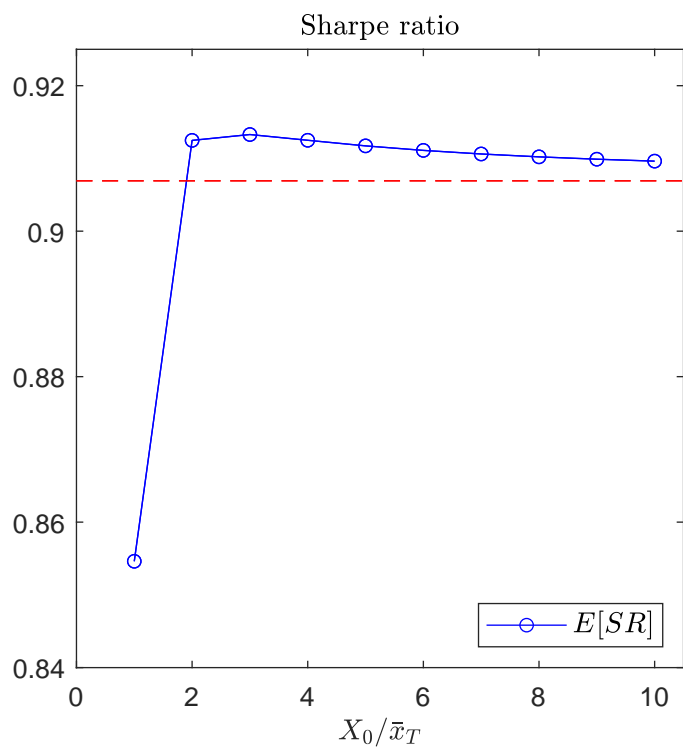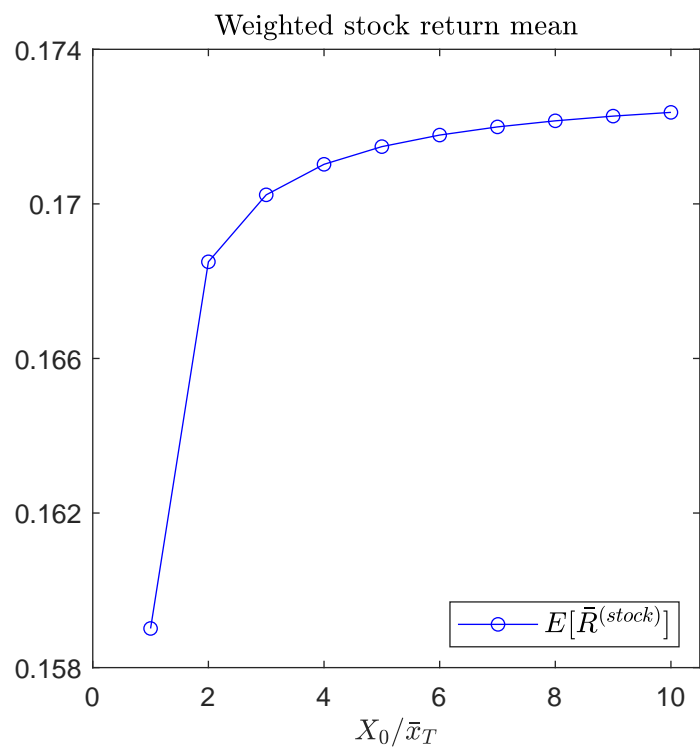

Supplement: opre.2024.0976.cd.zip [file perform_initial_wealth_231030.pdf › Codes_Data_OPRE_2024-04-0976/figures/perform_initial_wealth_231030.pdf]

Coefficient for optimal stock weight:  $\beta_\pi$

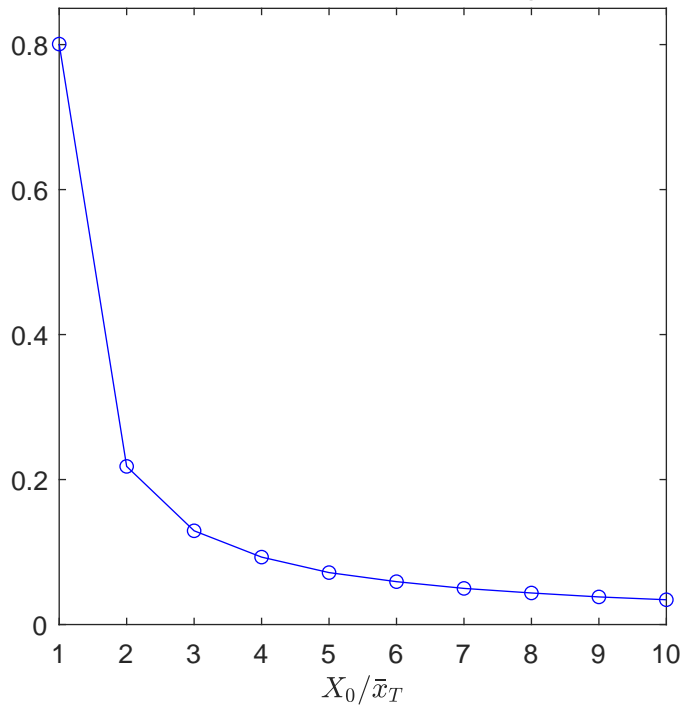

Coefficient for risk aversion:  $\beta_\gamma$

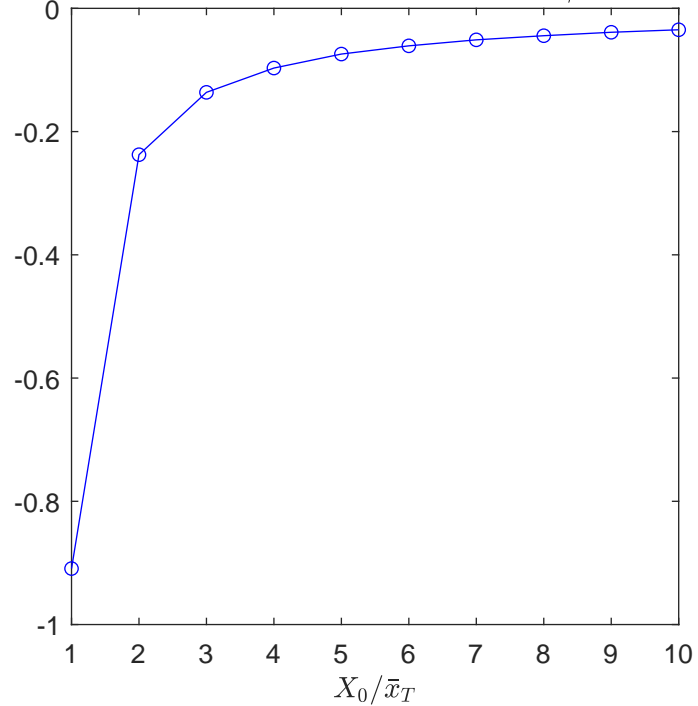

Supplement: opre.2024.0976.cd.zip [file regression_coef_plot.pdf › Codes_Data_OPRE_2024-04-0976/figures/regression_coef_plot.pdf]

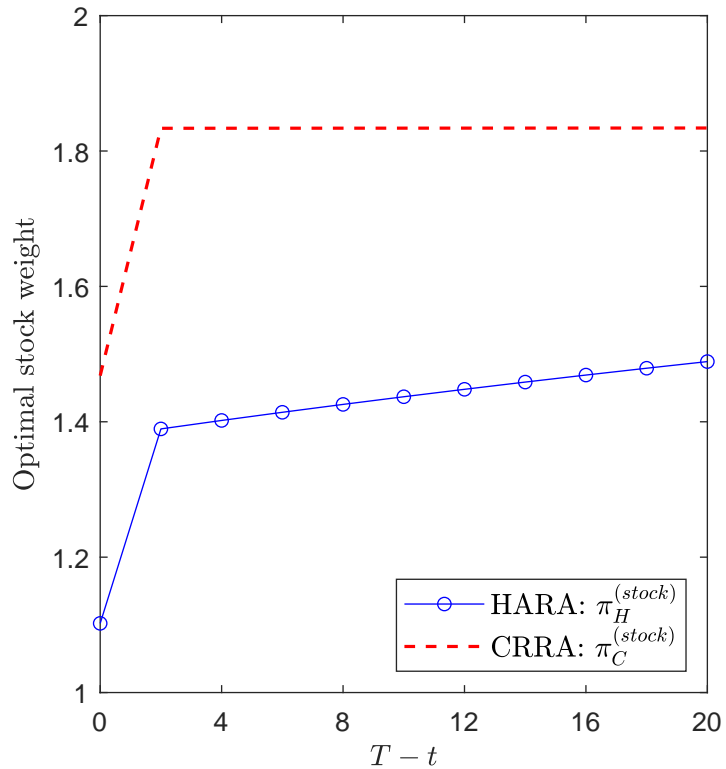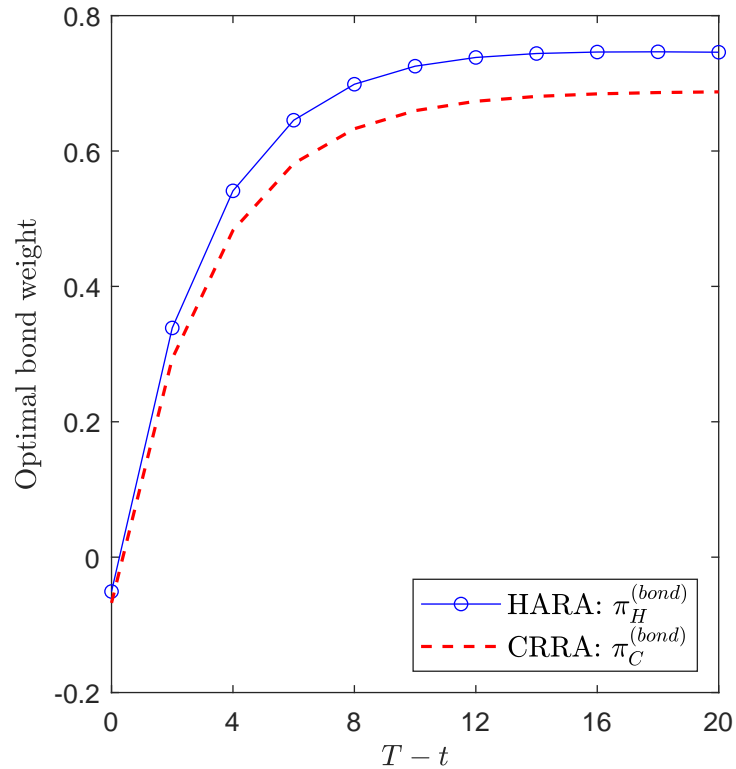

Supplement: opre.2024.0976.cd.zip [file static_impact_policy_horizon.pdf › Codes_Data_OPRE_2024-04-0976/figures/static_impact_policy_horizon.pdf]

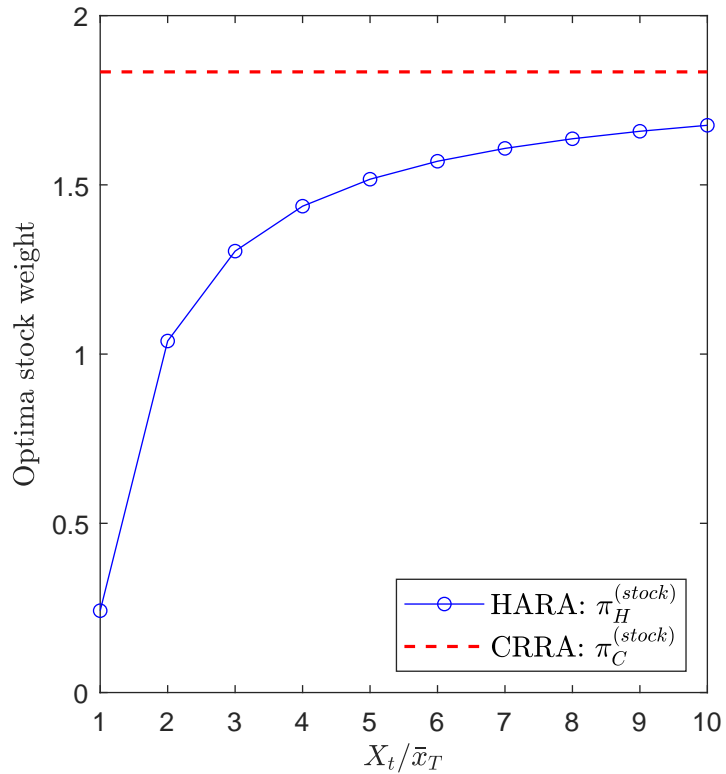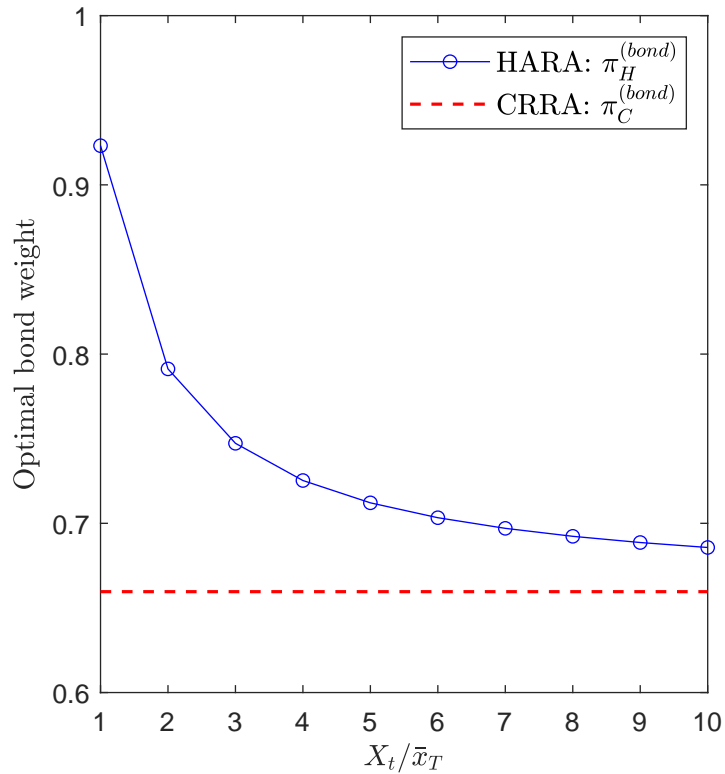

Supplement: opre.2024.0976.cd.zip [file static_impact_policy_wealth.pdf › Codes_Data_OPRE_2024-04-0976/figures/static_impact_policy_wealth.pdf]
